# Supplementary material
Source: PubMed Central journal article supplement (PMC4117926)
Supplement: NIHMS597733-supplement-01.pdf [file NIHMS597733-supplement-01.pdf]

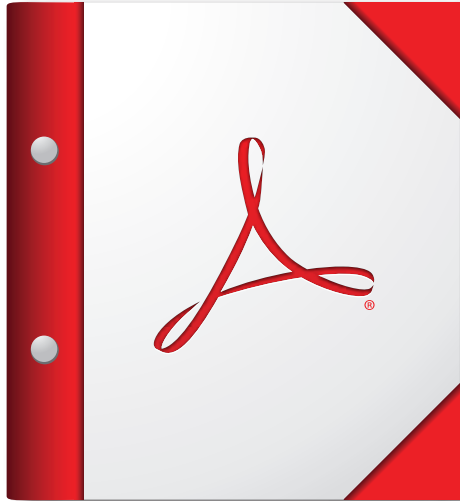

**For the best experience, open this PDF portfolio in  
Acrobat X or Adobe Reader X, or later.**

[Get Adobe Reader Now!](#)
